# Supplementary material
Source: Springer Nature journal article supplement (https://www.springermedizin.de/resource/supplementary/12990_2008_142_MOESM10_ESM.pdf/9612662)

# Audible vocalizations

## A U0124

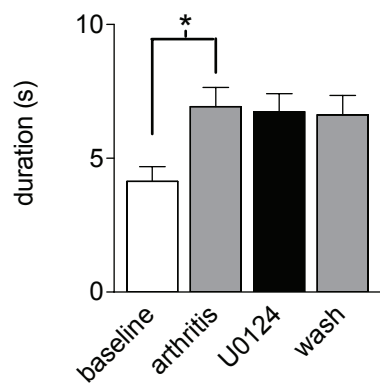

## D GF109203x

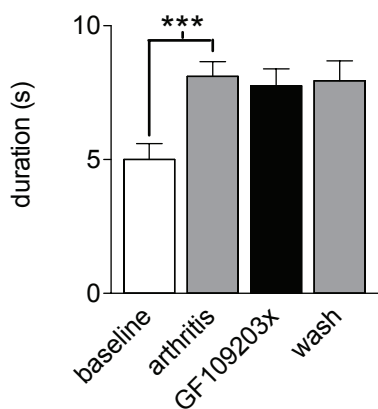

# Ultrasonic vocalizations

## B U0124

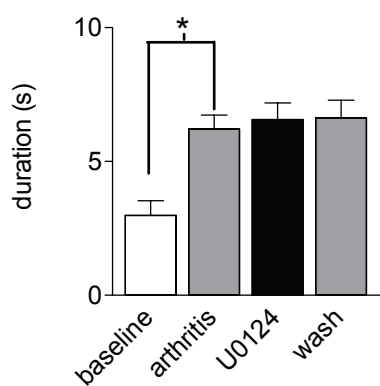

## E GF109203x

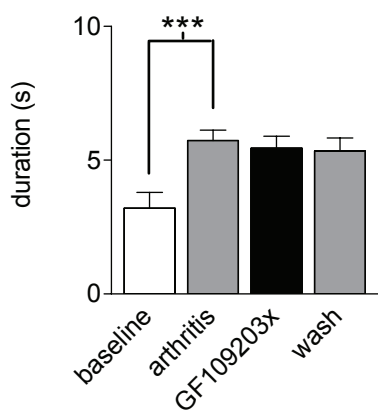

# Spinal reflex

## C U0124

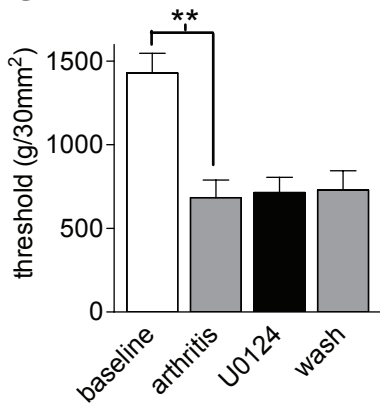

## F GF109203x

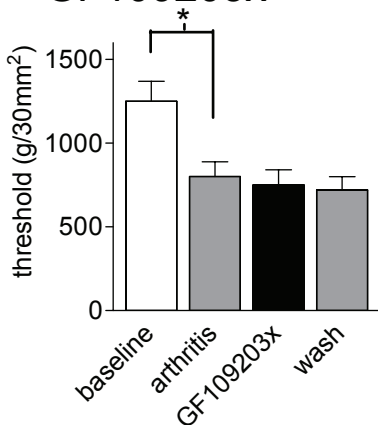

Supplement: MOESM10 [file 9612662]
